# Supplementary material for: Metabolic consequences of interleukin-6 challenge in developing neurons and astroglia
Source: PubMed Central journal article supplement (PMC4233071; doi:10.1186/s12974-014-0183-6), 2014-11-06

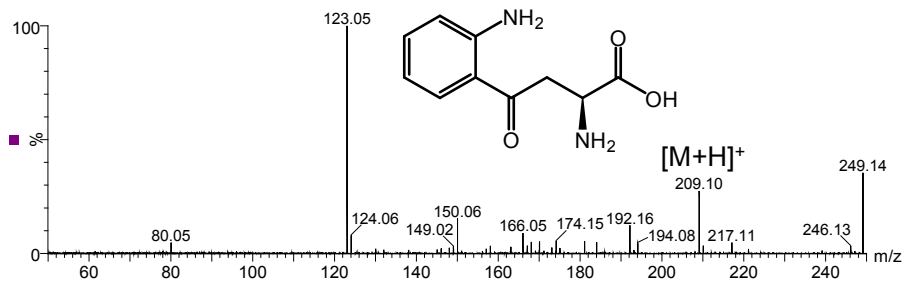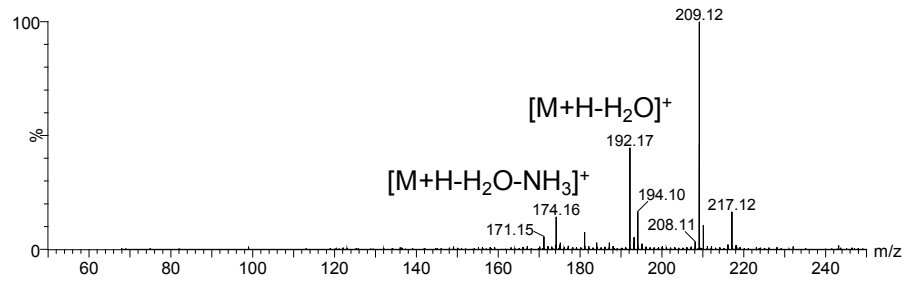

Supplement: 12974_2014_183_MOESM2_ESM.pdf [file 12974_2014_183_MOESM2_ESM.pdf]
