# Supplementary material for: Metabolic consequences of interleukin-6 challenge in developing neurons and astroglia
Source: PubMed Central journal article supplement (PMC4233071; doi:10.1186/s12974-014-0183-6), 2014-11-06
Supplement: 12974_2014_183_MOESM4_ESM.pdf [file 12974_2014_183_MOESM4_ESM.pdf]

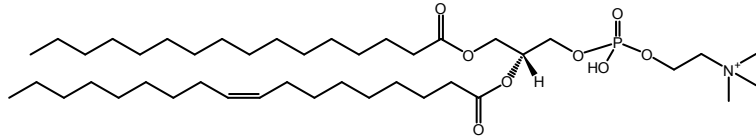

Chemical Formula:  $C_{42}H_{83}NO_8P^+$   
 Exact Mass: 760.59

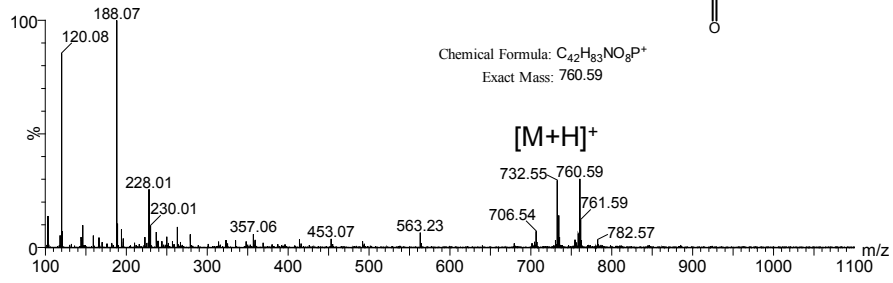

$[M+H]^+$

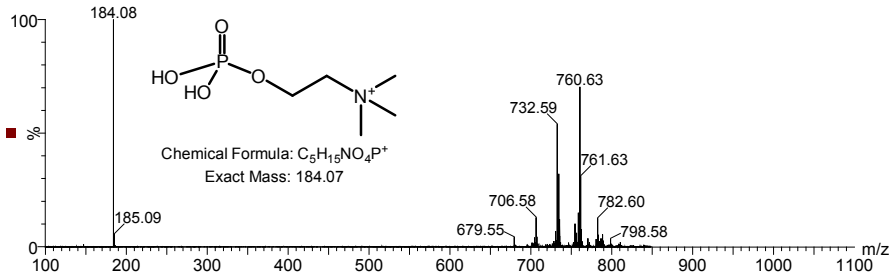

Chemical Formula:  $C_5H_{15}NO_4P^+$   
 Exact Mass: 184.07
