# Supplementary material for: Metabolic consequences of interleukin-6 challenge in developing neurons and astroglia
Source: Springer Nature journal article supplement (doi:10.1186/s12974-014-0183-6), 2014-11-05

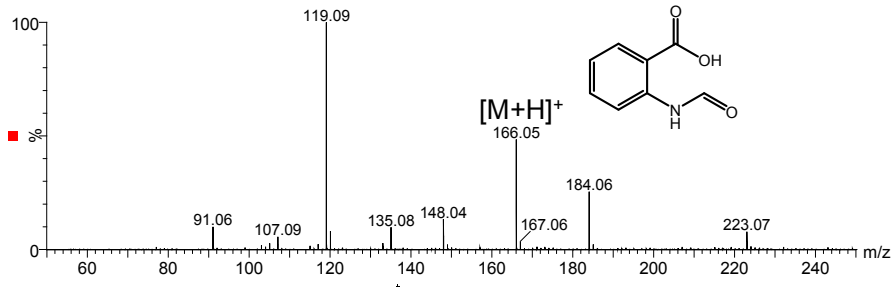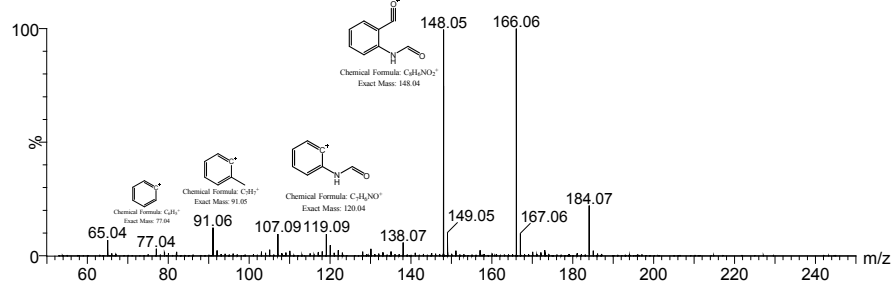

Supplement: MOESM3 [file 9768418]
